# Supplementary material
Source: PubMed Central journal article supplement (PMC3772719)
Supplement: NIHMS482181-supplement-01.pdf [file NIHMS482181-supplement-01.pdf]

## Supplementary Material

### Design, synthesis and evaluation of inhibitor of apoptosis protein (IAP) antagonists that are highly selective for the BIR2 domain of XIAP

Robert J. Ardecky,<sup>†a,b</sup> Kate Welsh,<sup>†a</sup> Pooi San Lee,<sup>a,b</sup> Marcos González-López,<sup>a,b</sup> Santhi Reddy Ganji,<sup>a,b</sup> Darren Finlay,<sup>a</sup> Palaniyandi Ramanan,<sup>a</sup> Peter D. Mace,<sup>a</sup> Stefan J. Riedl,<sup>a</sup> Kristiina Vuori,<sup>a,b</sup> John C. Reed,<sup>a,b</sup> Nicholas D. P. Cosford<sup>\*a,b</sup>

<sup>a</sup>Program in Apoptosis and Cell Death, NCI-Designated Cancer Center and <sup>b</sup>Conrad Prebys Center for Chemical Genomics, Sanford-Burnham Medical Research Institute, 10901 North Torrey Pines Road, La Jolla, CA 92037, USA.

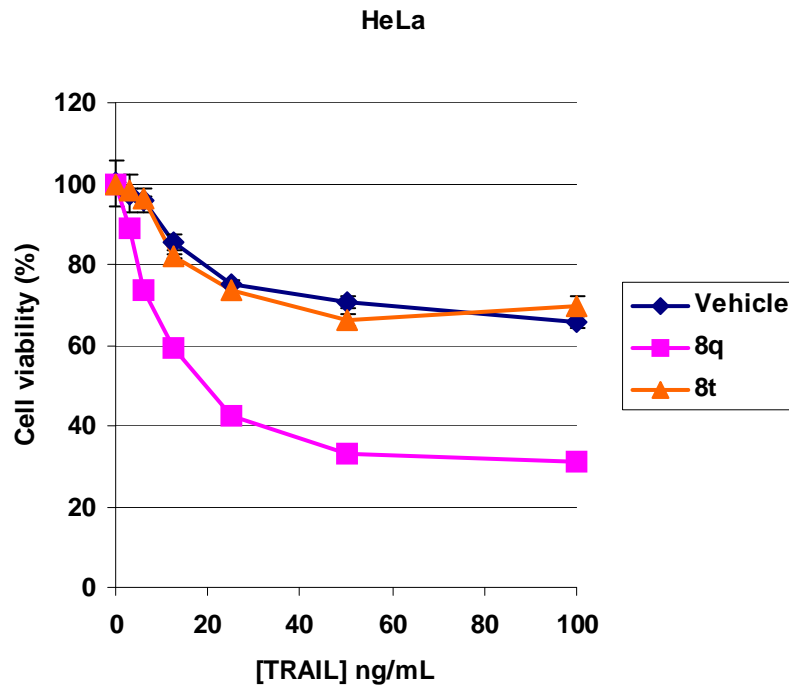

**Figure S1.** TRAIL-resistant HeLa cells challenged with TRAIL, or **8t** or **8q** (5  $\mu$ M) alone or in combination with TRAIL.

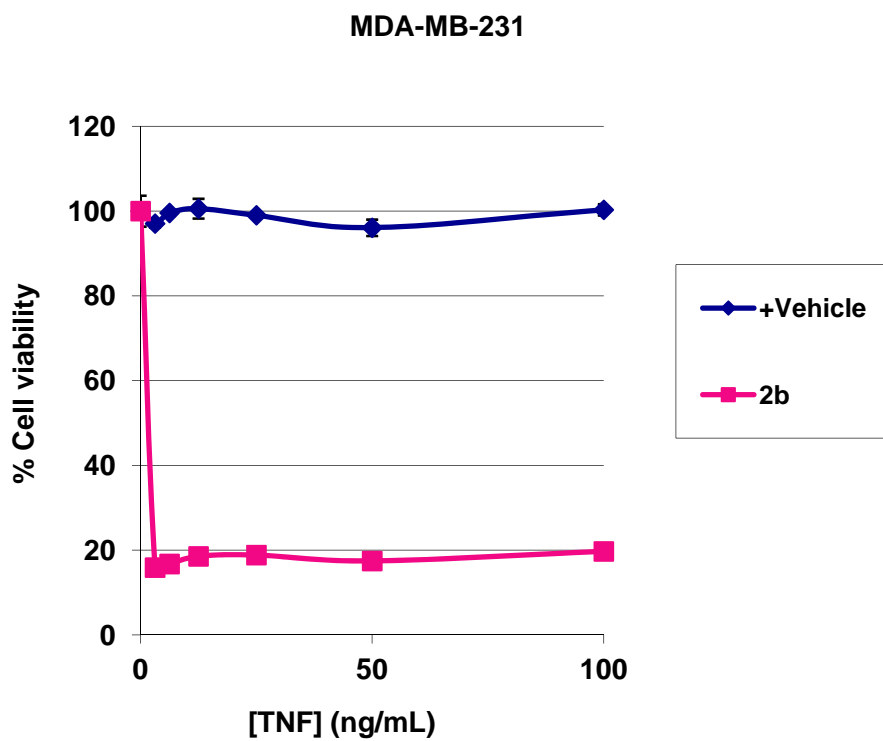

**Figure S2.** TRAIL-resistant MDA-MB-231 breast cancer cells challenged with TNF, or **2b** (5  $\mu$ M) alone or in combination with TNF.

Supplementary pages 3 and 4:  $^1\text{H}$  and  $^{13}\text{C}$  NMR spectra for compound **8q**.

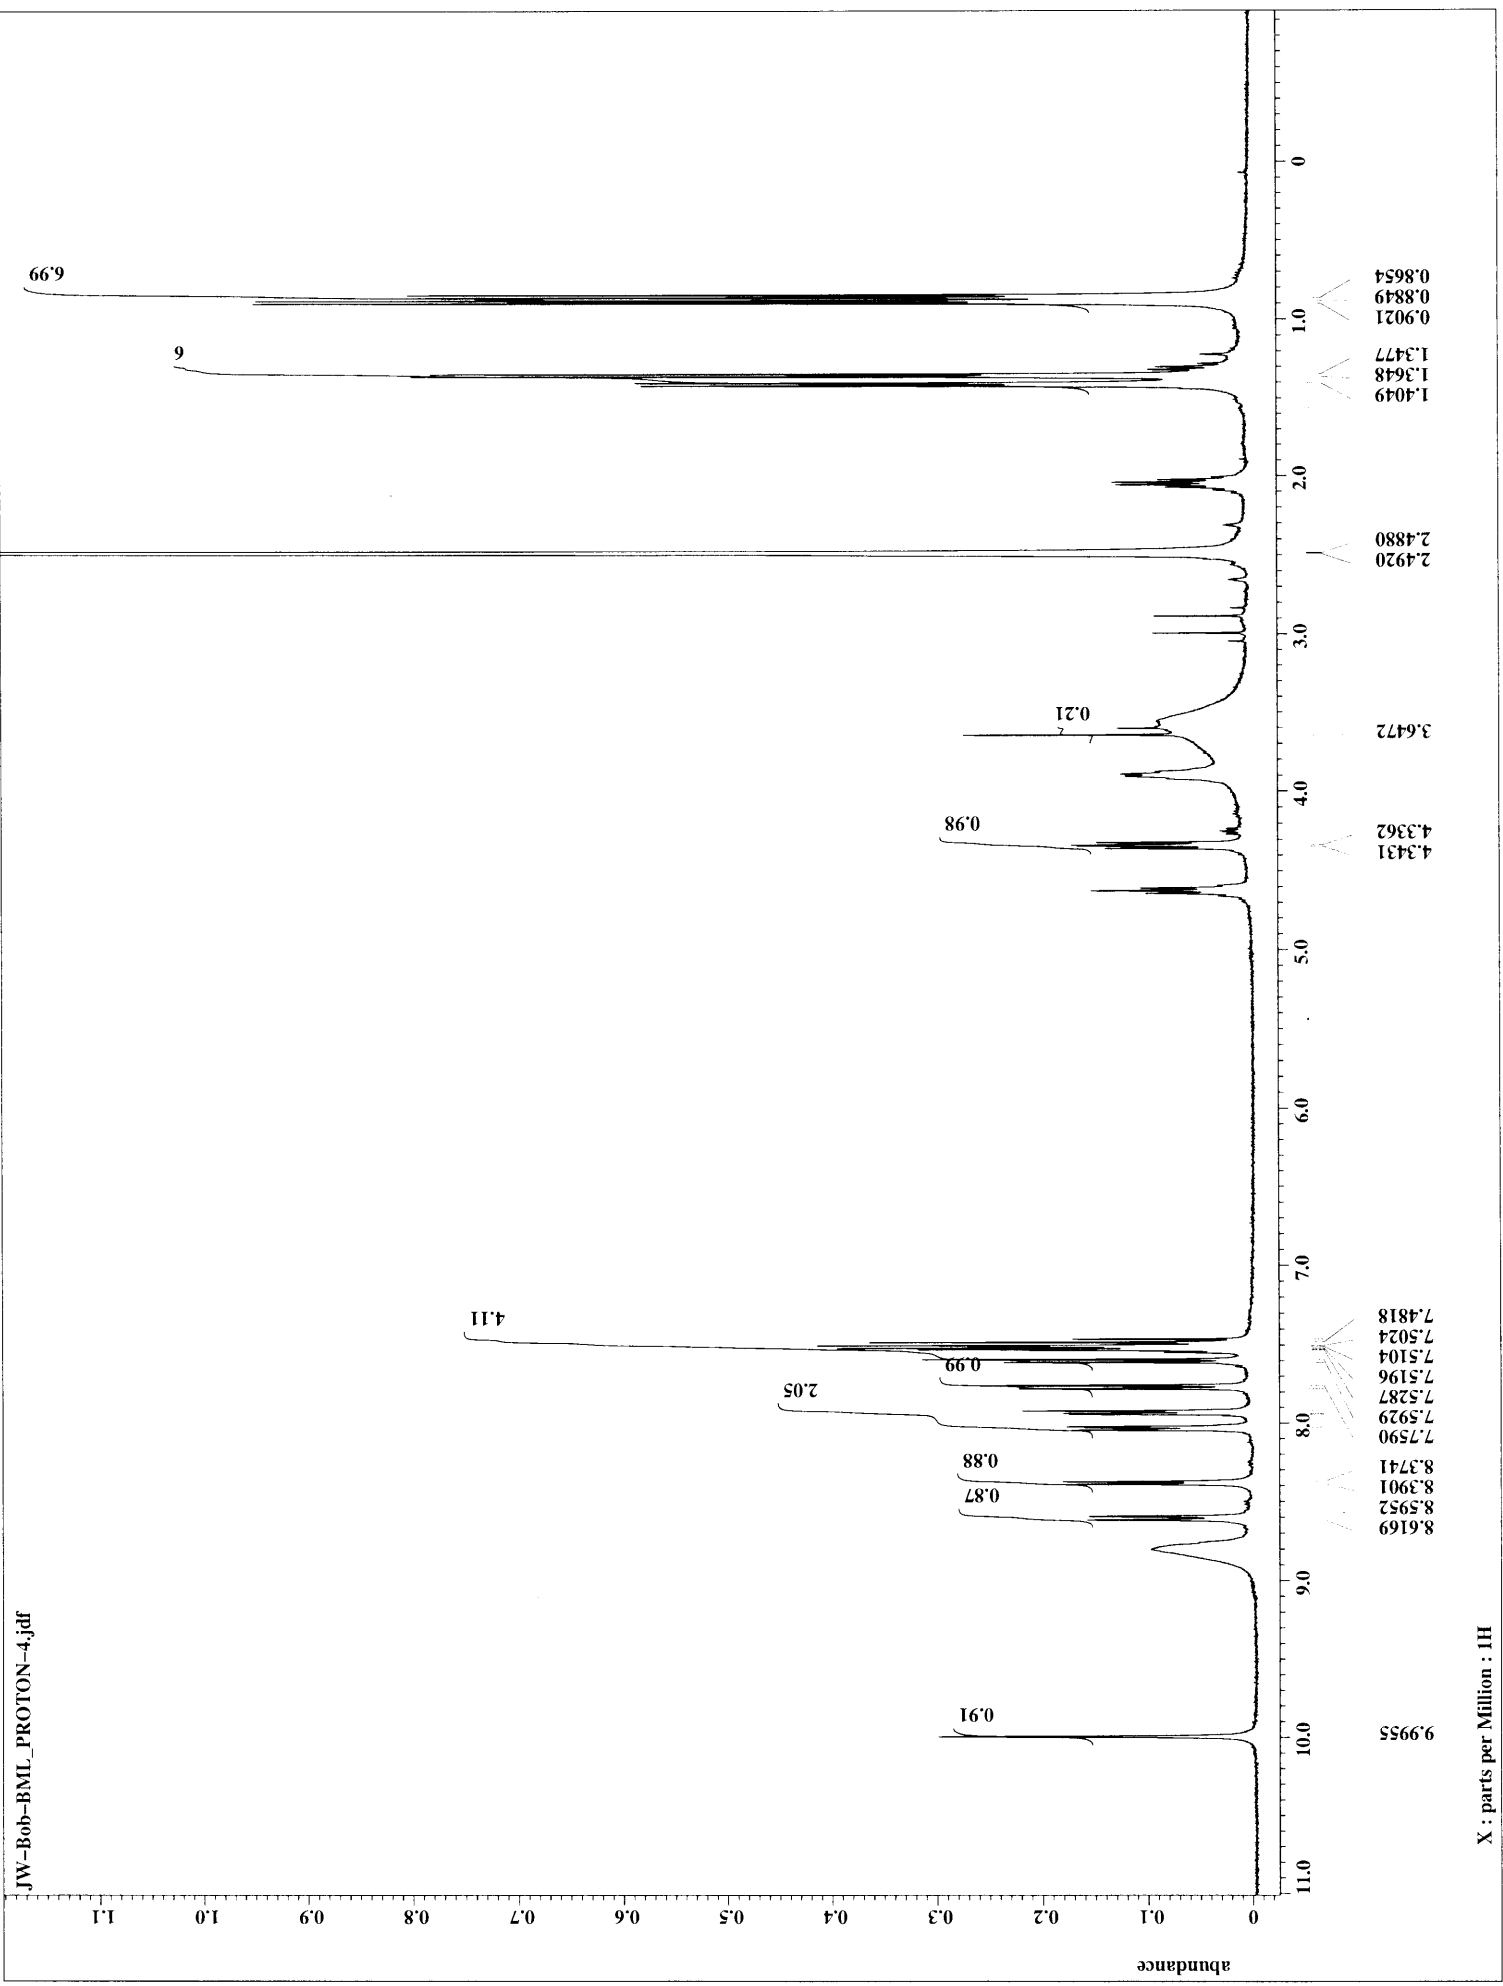

JW-Eob-BML\_CARBON-4.jdf

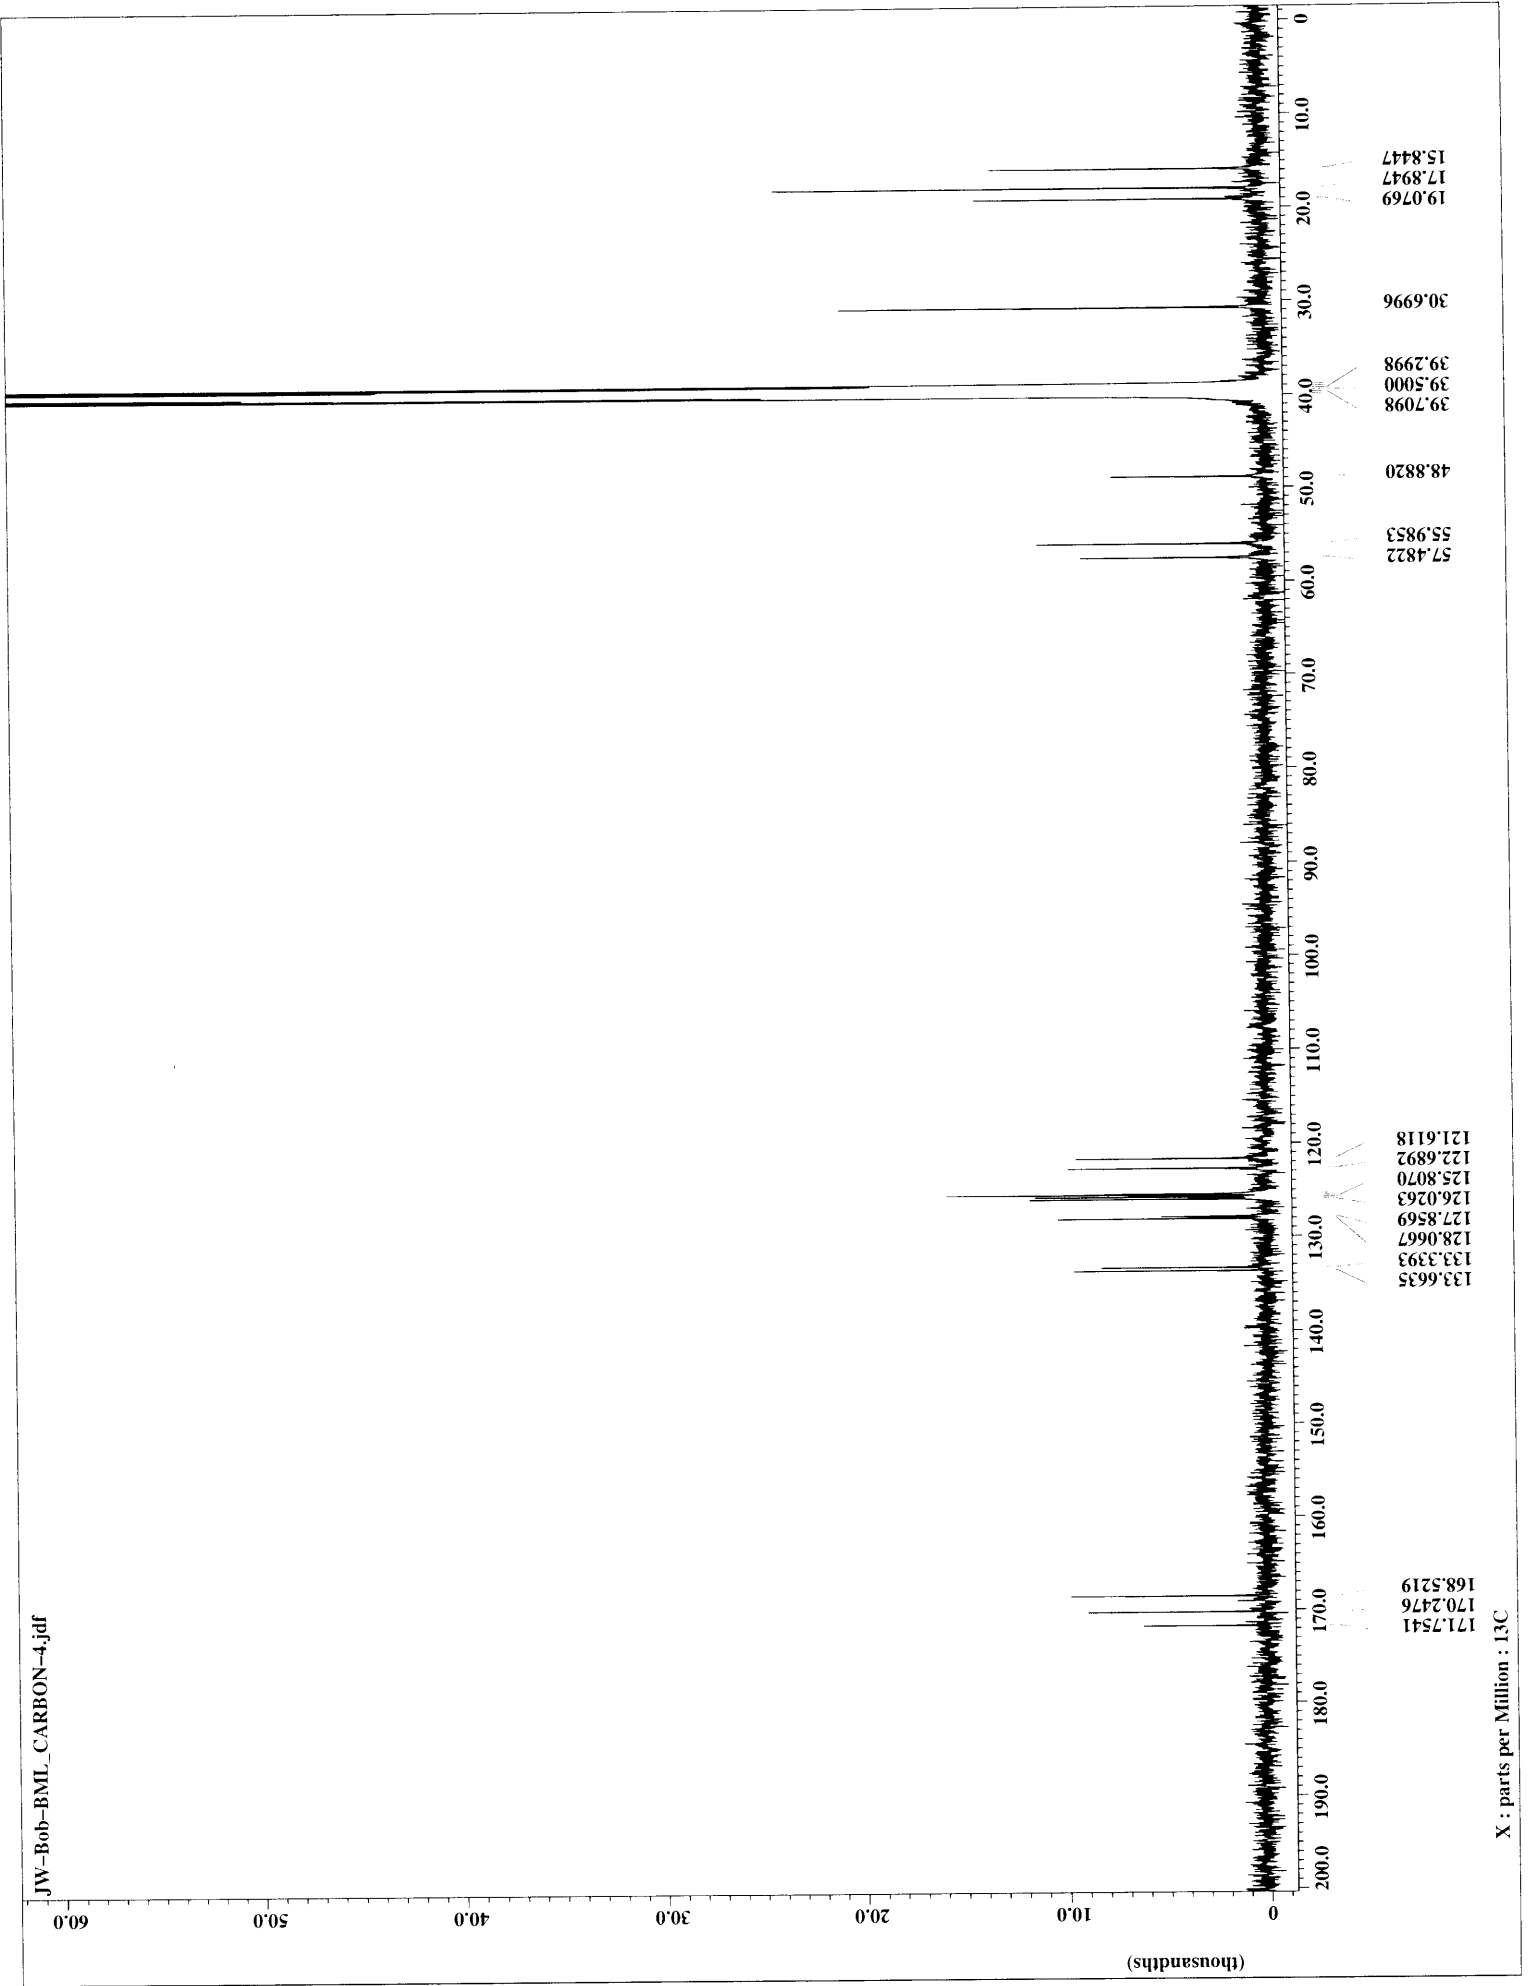

X : parts per Million : 13C
